# Supplementary material
Source: PubMed Central journal article supplement (PMC5802396)

## Supplementary Data

Figure 1.

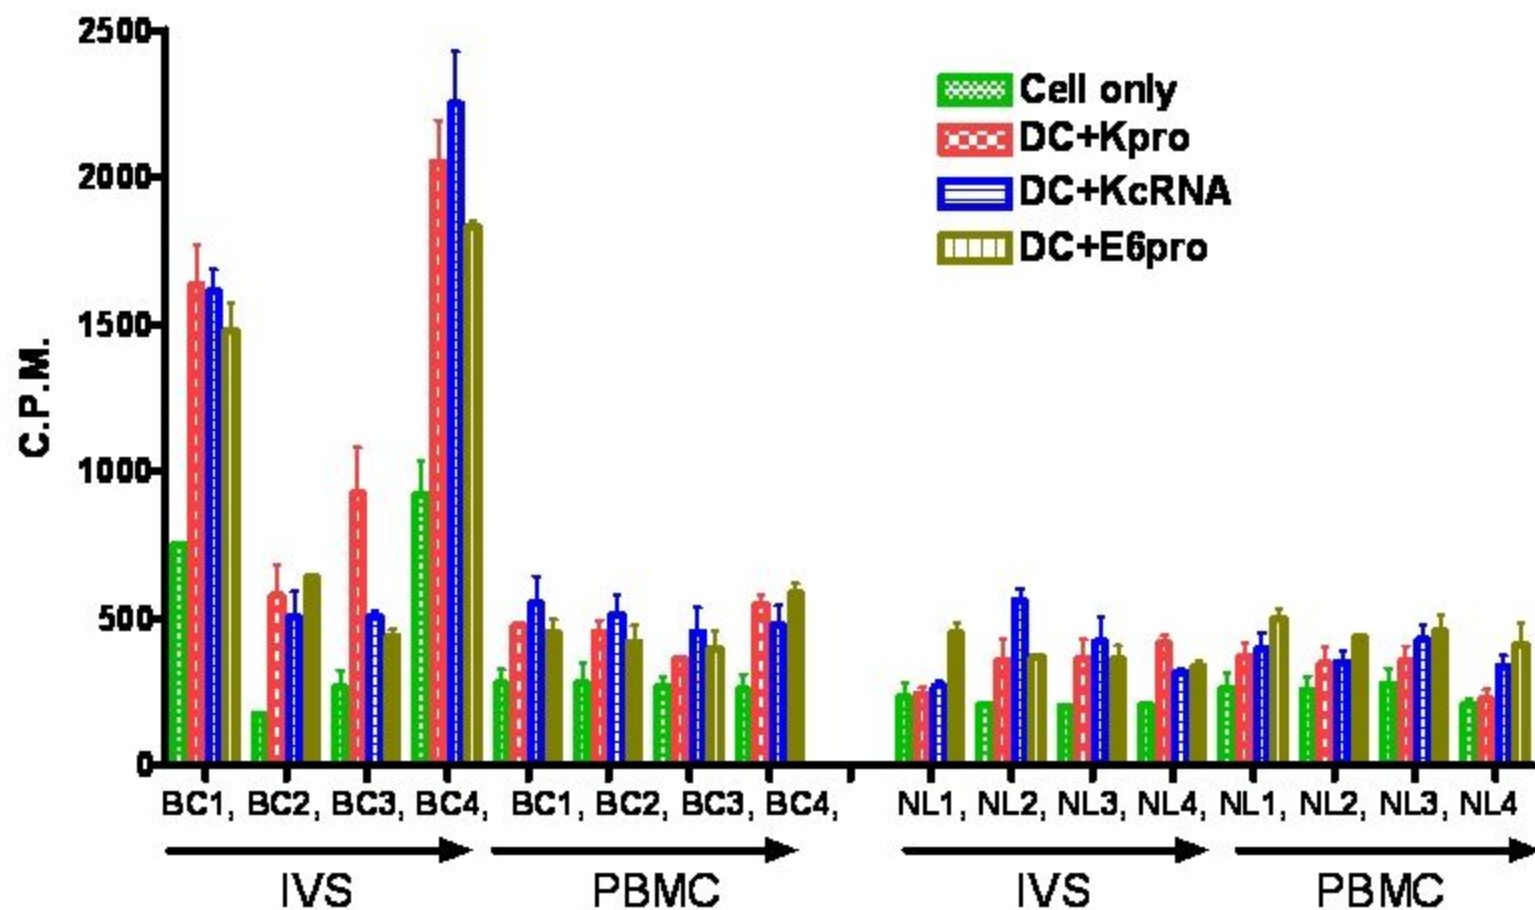

Supplement: NIHMS936695-supplement-Supplementary_Data.pdf [file NIHMS936695-supplement-Supplementary_Data.pdf]
